# Supplementary material for: Allelic Expression of Deleterious Protein-Coding Variants across Human Tissues
Source: PubMed Central journal article supplement (PMC4006732; doi:10.1371/journal.pgen.1004304), 2014-05-01
Supplement: pgen.1004304.s021.pdf [file pgen.1004304.s021.pdf]

**Table S1. Identification of high-confidence heterozygous and homozygous variants**

| <b>Type</b>                 | <b>Total Variants</b> | <b>Total High Confidence</b> | <b>Heterozygous High Confidence</b> | <b>Homozygous High Confidence</b> |
|-----------------------------|-----------------------|------------------------------|-------------------------------------|-----------------------------------|
| Total SNVs                  | 51,875                | 45,058                       | 25,570                              | 19,488                            |
| Total gene-associated SNVs  | 51,829                | 45,020                       | 25,555                              | 19,465                            |
| Total coding                | 23,100                | 21,587                       | 12,772                              | 8,815                             |
| Missense: benign            | 9,049                 | 8,476                        | 4,741                               | 3,735                             |
| Missense: deleterious (LoF) | 2,436                 | 2,124                        | 1,632                               | 492                               |
| Nonsense (LoF)              | 118                   | 105                          | 75                                  | 30                                |
| Synonymous                  | 11,497                | 10,882                       | 6,324                               | 4,558                             |
| 5'UTR                       | 1,403                 | 1,169                        | 593                                 | 576                               |
| 3'UTR                       | 2,130                 | 1,882                        | 1,039                               | 843                               |
| Intron                      | 23,539                | 19,324                       | 10,585                              | 8,739                             |
| Ts/Tv                       | —                     | 2.61                         | —                                   | —                                 |
| Rare SNV                    | 5,246                 | 2,767                        | 2,227                               | 540                               |
