# Supplementary material for: Allelic Expression of Deleterious Protein-Coding Variants across Human Tissues
Source: PubMed Central journal article supplement (PMC4006732; doi:10.1371/journal.pgen.1004304), 2014-05-01
Supplement: pgen.1004304.s022.pdf [file pgen.1004304.s022.pdf]

**Table S2. Identification of high-confidence common and rare variants**

| <b>Variant Type</b>         | <b>Total High Confidence</b> | <b>Common High Confidence</b> | <b>Rare High Confidence</b> |
|-----------------------------|------------------------------|-------------------------------|-----------------------------|
| Total SNVs                  | 45,058                       | 42,291                        | 2,767                       |
| Total gene-associated SNVs  | 45,020                       | 42,253                        | 2,767                       |
| Total coding                | 21,587                       | 20,688                        | 899                         |
| Missense: benign            | 8,476                        | 8,097                         | 379                         |
| Missense: deleterious (LOF) | 2,124                        | 1,918                         | 206                         |
| Nonsense (LOF)              | 105                          | 96                            | 9                           |
| Synonymous                  | 10,882                       | 10,577                        | 305                         |
| 5'UTR                       | 1,169                        | 1,091                         | 78                          |
| 3'UTR                       | 1,882                        | 1,788                         | 94                          |
| Intron                      | 19,324                       | 17,957                        | 1,367                       |
| Ts/Tv                       | 2.61                         | —                             | —                           |
