# Supplementary material for: Allelic Expression of Deleterious Protein-Coding Variants across Human Tissues
Source: PubMed Central journal article supplement (PMC4006732; doi:10.1371/journal.pgen.1004304), 2014-05-01
Supplement: pgen.1004304.s023.pdf [file pgen.1004304.s023.pdf]

**Table S3. Identification of high-confident RNA-Seq ASE sites by quality-control filtering**

| Tissue          | Ref to Non-ref Ratio | Total sites pre-filters | Total sites post-filters |          |        |                       |             |
|-----------------|----------------------|-------------------------|--------------------------|----------|--------|-----------------------|-------------|
|                 |                      |                         | BQ>10                    | Depth>10 | p<0.05 | Bi-allelic expression | Intra-genic |
| Cerebellum      | 0.553                | 1,993                   | 1,993                    | 1,802    | 474    | 294                   | 277         |
| Colon           | 0.586                | 4,045                   | 4,045                    | 3,773    | 1,148  | 851                   | 709         |
| Frontal lobe    | 0.530                | 3,796                   | 3,796                    | 3,475    | 779    | 482                   | 466         |
| Heart           | 0.554                | 3,216                   | 3,216                    | 2,954    | 806    | 489                   | 458         |
| Small intestine | 0.581                | 3,789                   | 3,789                    | 3,468    | 1,117  | 803                   | 683         |
| Liver           | 0.550                | 4,215                   | 4,215                    | 3,794    | 1,177  | 791                   | 719         |
| Lung            | 0.587                | 6,003                   | 6,003                    | 5,550    | 1,371  | 945                   | 820         |
| Skeletal muscle | 0.561                | 4,291                   | 4,291                    | 3,900    | 1,042  | 649                   | 614         |
| Pancreas        | 0.594                | 2,128                   | 2,128                    | 1,839    | 556    | 348                   | 332         |
| Stomach         | 0.623                | 4,264                   | 4,264                    | 3,826    | 1,029  | 680                   | 566         |

To identify high-confident ASE sites, we implemented several quality control filters. We only kept ASE sites which met the following criteria: 1) base quality (BQ) greater than 10; 2) minimum sequencing depth of 10 reads; 3) calculated p-value less than 0.05 from the binomial test; 4) bi-allelic expression; and 5) intragenic location.
