# Supplementary material for: Allelic Expression of Deleterious Protein-Coding Variants across Human Tissues
Source: PubMed Central journal article supplement (PMC4006732; doi:10.1371/journal.pgen.1004304), 2014-05-01
Supplement: pgen.1004304.s024.pdf [file pgen.1004304.s024.pdf]

**Table S4. OMIM genes associated with Mendelian disease phenotypes harboring rare, deleterious nonsynonymous variants**

| <b>ASE across tissues</b> | <b>Gene</b> | <b>OMIM disease association</b>        |
|---------------------------|-------------|----------------------------------------|
| Shared ASE                | CACNA1A     | Cerebellar ataxia, Hemiplegic migraine |
| Shared ASE                | FMO3        | Fish-odor syndrome, Trimethylaminuria, |
| Shared ASE                | TBX21       | Asthma and nasal polyps                |
| No ASE                    | DOCK8       | Mental retardation, autosomal dominant |
| No ASE                    | MTTP        | Abetalipoproteinemia                   |
| No ASE                    | NLRP3       | CINCA syndrome, Muckle-Wells syndrome  |
| No ASE                    | SLC25A13    | Citrullinemia type II                  |
| No ASE                    | TMEM168     | Alveolar soft-part sarcoma,            |
