# Supplementary material for: Allelic Expression of Deleterious Protein-Coding Variants across Human Tissues
Source: PubMed Central journal article supplement (PMC4006732; doi:10.1371/journal.pgen.1004304), 2014-05-01
Supplement: pgen.1004304.s025.pdf [file pgen.1004304.s025.pdf]

**Table S5. Allelic imbalance of deleterious nsSNPs, stop-gained variants, and control sites across tissues**

|                        | <b>Control</b> | <b>Deleterious nsSNPs</b> |                | <b>Stop-gained</b> |                |
|------------------------|----------------|---------------------------|----------------|--------------------|----------------|
|                        | <b>mean</b>    | <b>mean</b>               | <b>p-value</b> | <b>mean</b>        | <b>p-value</b> |
| <b>Cerebellum</b>      | 0.481          | 0.415                     | 0.016          | 0.391              | 0.059          |
| <b>Colon</b>           | 0.474          | 0.430                     | 0.068          | 0.392              | 0.057          |
| <b>Frontal Lobe</b>    | 0.465          | 0.428                     | 0.084          | 0.363              | 0.007          |
| <b>Heart</b>           | 0.449          | 0.432                     | 0.277          | 0.343              | 0.016          |
| <b>Small Intestine</b> | 0.479          | 0.440                     | 0.065          | 0.364              | 0.011          |
| <b>Liver</b>           | 0.460          | 0.413                     | 0.053          | 0.343              | 0.008          |
| <b>Lung</b>            | 0.485          | 0.412                     | 0.007          | 0.386              | 0.025          |
| <b>Skeletal Muscle</b> | 0.441          | 0.439                     | 0.463          | 0.337              | 0.014          |
| <b>Pancreas</b>        | 0.452          | 0.394                     | 0.028          | 0.346              | 0.031          |
| <b>Stomach</b>         | 0.469          | 0.438                     | 0.125          | 0.359              | 0.015          |

We tested if deleterious nsSNPs and stop-gained variants have a statistically significant reduction in expression across all tissues compared to control sites. We calculated the mean allelic ratio for each variant group and used the student's t-test to determine if there is a significant difference between the control sites and the corresponding variant group (deleterious nsSNPs or stop-gained variants). The mean allelic ratios for each variant group and the calculated p-values are shown in the table.
